# Supplementary material
Source: Springer Nature journal article supplement (https://www.springermedizin.de/resource/supplementary/12913_2013_3735_MOESM4_ESM.pdf/9532288)
Supplement: MOESM4 [file 9532288]

**Elite parent**

0.27

**0.89**

**0.59**

**0.11**

0.55

**Non-elite parent**

**0.36**

0.98

0.21

0.08

**0.62**

---

**CROSSOVER**

---

Random values  $< 0.6$ ?  
(Probability = 0.6)

( 0.86 , 0.42 , 0.33 , 0.19 , 0.66 )

---

**Child**

0.36

0.89

0.59

0.11

0.62
